# Supplementary material for: Near-natural transformation of Pinus tabuliformis better improve soil nutrients and soil microbial community
Source: PeerJ. 2021 Sep 23;9:e12098. doi: 10.7717/peerj.12098 (PMC8465996; doi:10.7717/peerj.12098)
Supplement: Supplemental Information 4 — TC: total carbon, TN: total nitrogen, TP: total phosphorus, AN: available nitrogen, AP: available phosphorus, AK: available potassium, PT: Pinus tabuliformis, PTAU: Pinus tabuliformis-Armeniaca vulgaris mixed forest, PTRP: Pinus tabuliformis-Robinia pseudoacacia mixed forest, PTVN: Pinus tabuliformis-Vitex negundo L. var. heterophylla mixed forest. Different uppercase letters in the same row indicate significant difference at the 0.01 level, and different lowercase letters in the same row indicate significant differences at the 0.05 level. [file peerj-09-12098-s004.xlsx]

## Sheet: Sheet1
type	pH	TC	TN	C/N	TP	AN	AP	AK
PTVN1	7.22	12.42	1.23	10.0976	0.26	88.4625	2.8	81.9
PTVN2	7.18	11.95	1.12	10.6696	0.24	80.6778	2.5	74.9
PTVN3	7.25	12.36	1.12	11.0357	0.29	92.7087	3.6	83.2
PTVN4	7.16	17.5	1.55	11.2903	0.26	118.894	2.8	76.7
PT1	6.51667	14.77	1.01	14.6238	0.35	52.3698	3.3	52.7
PT2	6.73667	12.14	0.82	14.8049	0.33	58.3852	4	69.7
PT3	6.85333	11.26	0.74	15.2162	0.29	57.3237	3.3	55.4
PT4	6.89333	14.52	1.01	14.3762	0.35	81.3855	2.9	83.1
PTAU1	7.71333	22.23	1.92	11.5781	0.44	130.571	3.9	100.7
PTAU2	7.62333	17.39	1.09	15.9541	0.34	75.37	2.7	90.2
PTAU3	7.72333	18.27	1.28	14.2734	0.36	102.616	3.2	84.7
PTAU4	7.79	22.5	1.62	13.8889	0.51	124.909	4.6	135.6
PTRP1	7.81	17.15	1.52	11.2829	0.46	97.3088	3.4	102.4
PTRP2	7.38333	14.63	1.4	10.45	0.52	110.047	2.8	84.8
PTRP3	7.78	12.83	1.36	9.43382	0.44	89.524	2.9	85.6
PTRP4	7.60333	14.6	1.53	9.54248	0.48	110.401	3.8	128
